# Supplementary material for: Building metal-functionalized porous carbons from microporous organic polymers for CO2 capture and conversion under ambient conditions
Source: Royal Society of Chemistry journal article supplement (doi:10.1039/c9cy00633h), 2019-01-01
Supplement: c9cy00633h1.pdf [file c9cy00633h1.pdf]

## Supplementary Information

### Building Metal-functionalized Porous Carbons from Microporous Organic Polymers for CO<sub>2</sub> Capture and Conversion under Ambient Conditions

*Shuai Gu, ‡ Wenguang Yu, ‡ Jingjing Chen, He Zhang, Yan Wang, Juntao Tang, Guipeng Yu, \* Chunyue Pan*

College of Chemistry and Chemical Engineering, Central South University, Changsha, Hunan 410083, P. R. China.

‡These authors contributed equally to this work.

Corresponding author: Professor Guipeng Yu (e-mail: gilbertyu@csu.edu.cn).

#### Table of Contents

|                                                |    |
|------------------------------------------------|----|
| 1. Character.....                              | 2  |
| 2. Powder X-Ray Diffraction.....               | 3  |
| 3. Morphology analysis by SEM.....             | 4  |
| 4. Morphology analysis by TEM.....             | 5  |
| 5. Elemental analysis.....                     | 7  |
| 6. Infrared spectroscopy.....                  | 8  |
| 7. CO <sub>2</sub> cycloaddition reaction..... | 10 |

## 1. Character

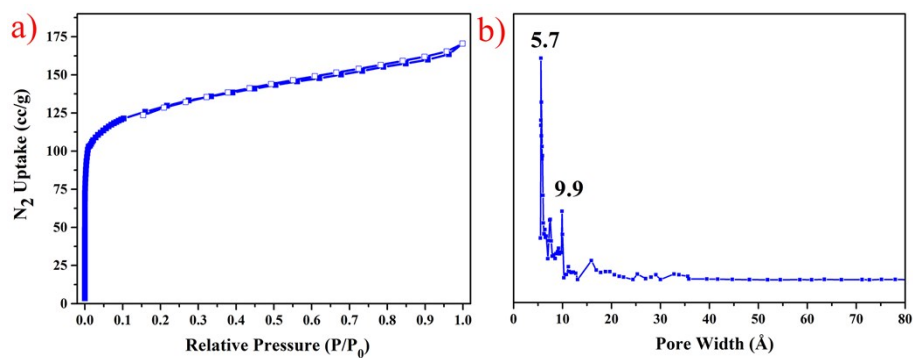

**Figure S1.** (a)  $N_2$  adsorption (solid symbols)/desorption (open symbols) isotherms at 77K and (b) NLDFT pore size distribution of the precursor.

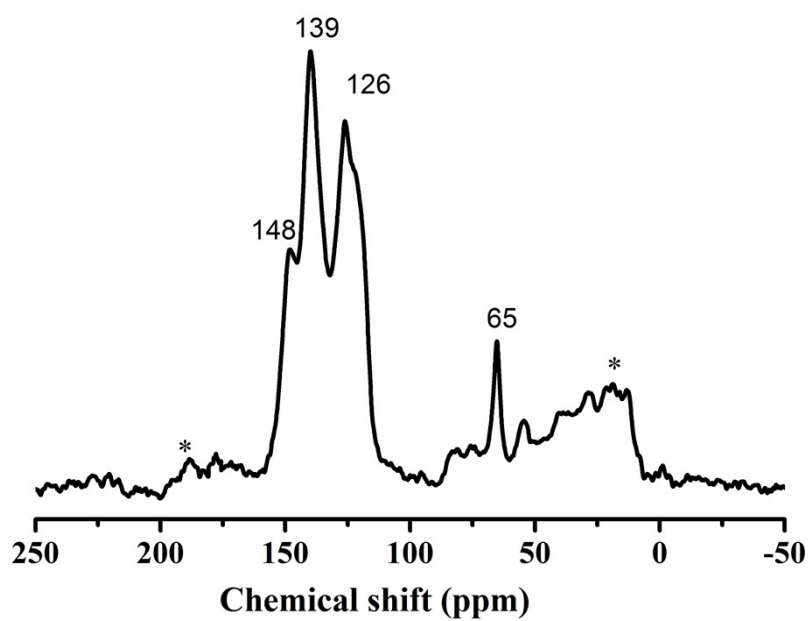

**Figure S2.**  $^{13}C$  CP-MAS NMR spectrum of the precursor.

## 2. Powder X-Ray Diffraction

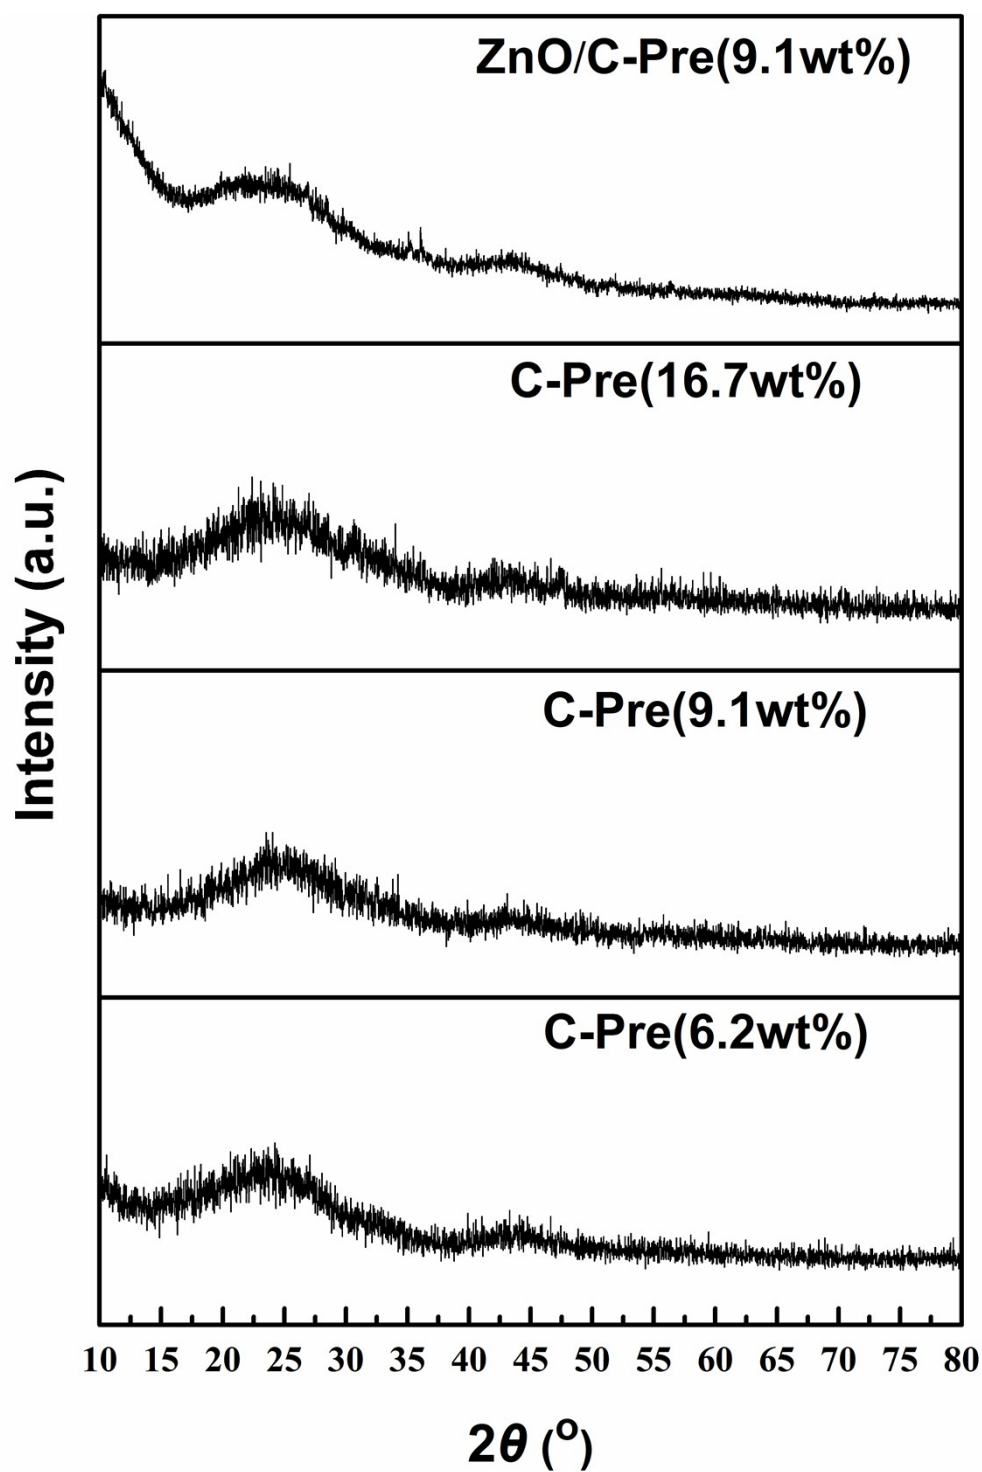

**Figure S3.** Powder X-Ray Diffraction of porous carbons.

### 3. Morphology analysis by SEM

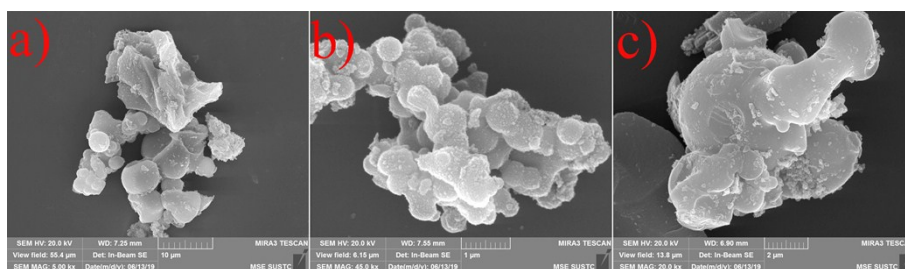

**Figure S4.** SEM images of (a) ZnO/C-Pre(9.1wt%), (b) C-Pre(9.1wt%) and (c) ZnO/C-Pre(9.1wt%)/PBM.

#### 4. Morphology analysis by TEM

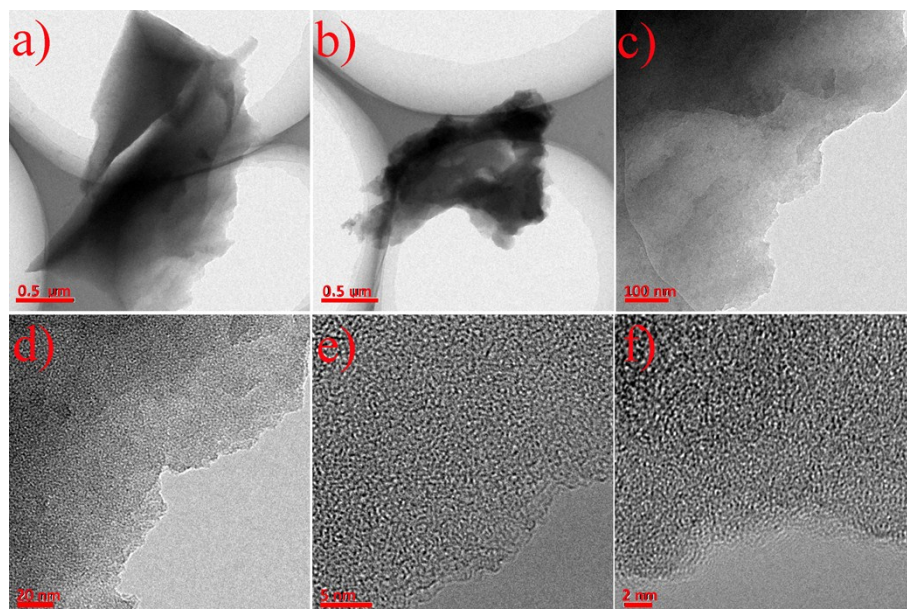

**Figure S5.** TEM images of precursor.

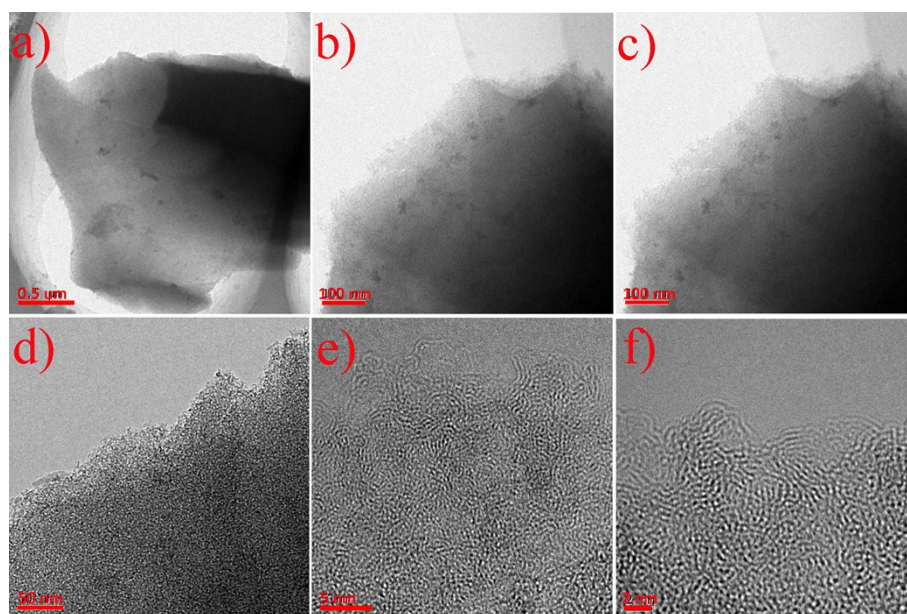

**Figure S6.** TEM images of C-Pre(9.1wt%).

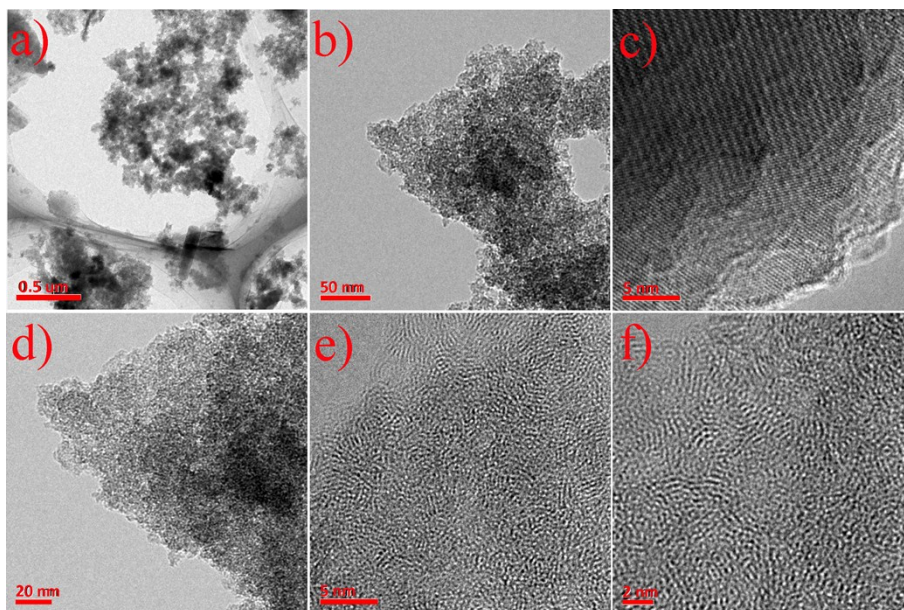

**Figure S7.** TEM images of ZnO/C-Pre(9.1wt%).

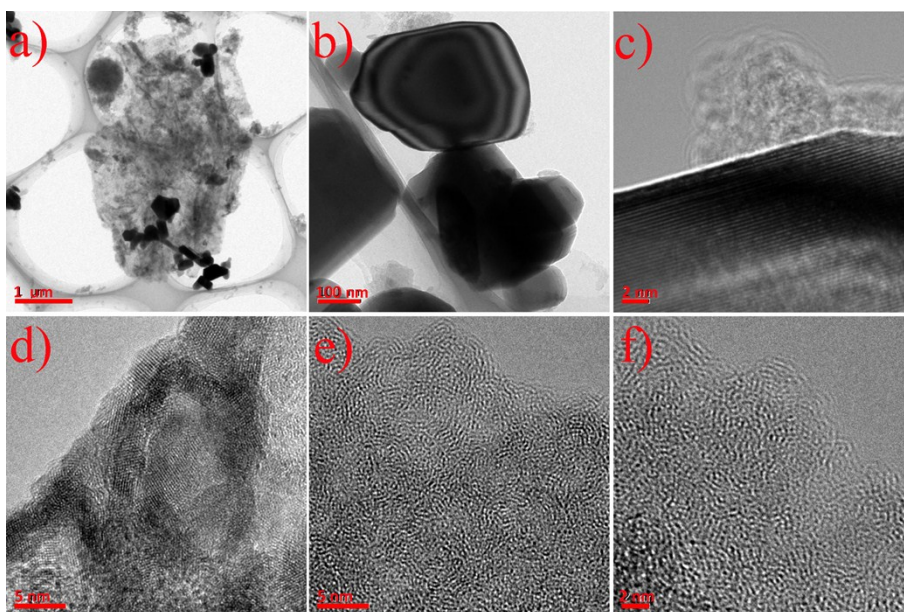

**Figure S8.** TEM images of ZnO/C-Pre(9.1wt%)/PBM.

## 5. Elemental analysis

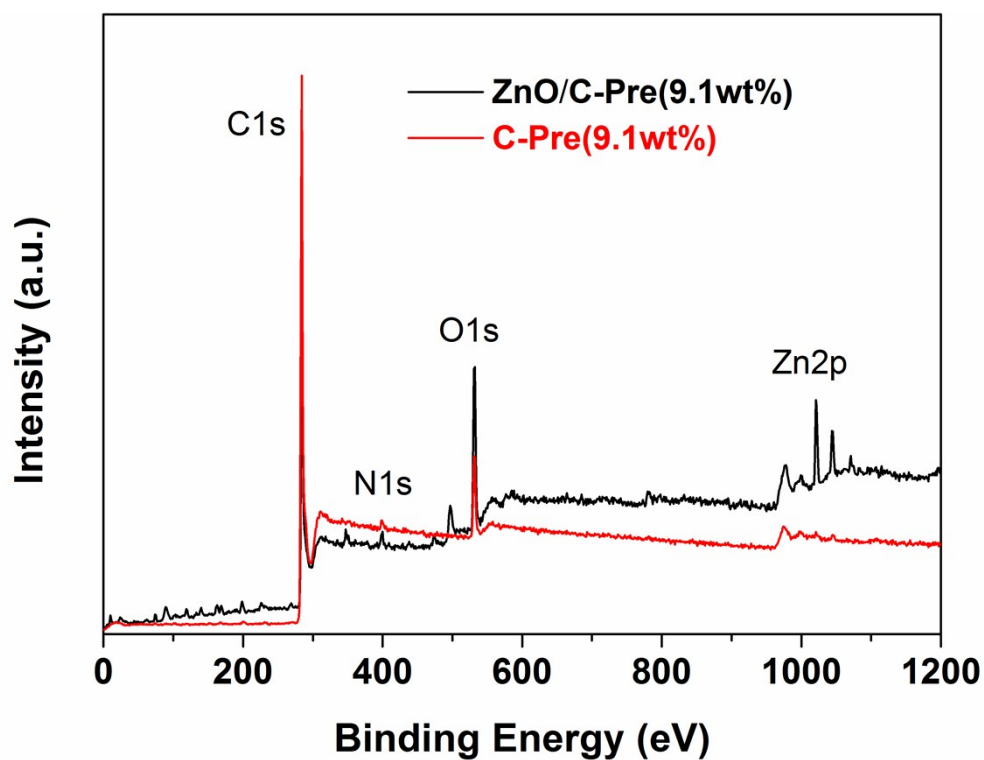

Figure S9. Wide XPS survey spectra of carbons.

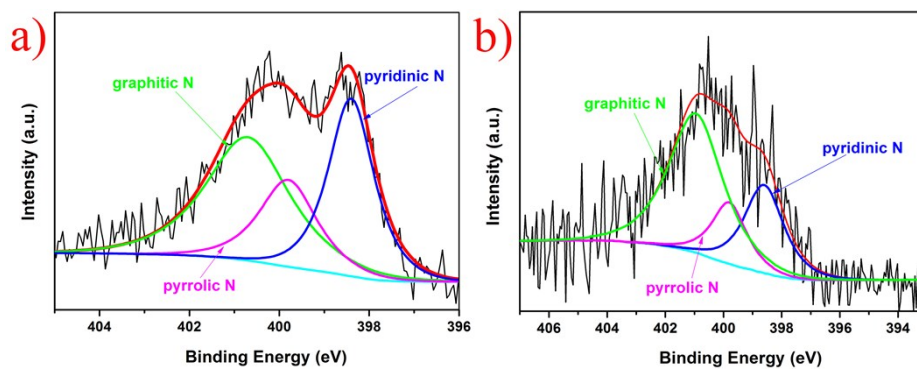

Figure S10. High-resolution N 1s XPS spectra of (a) ZnO/C-Pre(9.1wt%) and (b) C-Pre(9.1wt%).

## 6. Infrared spectroscopy

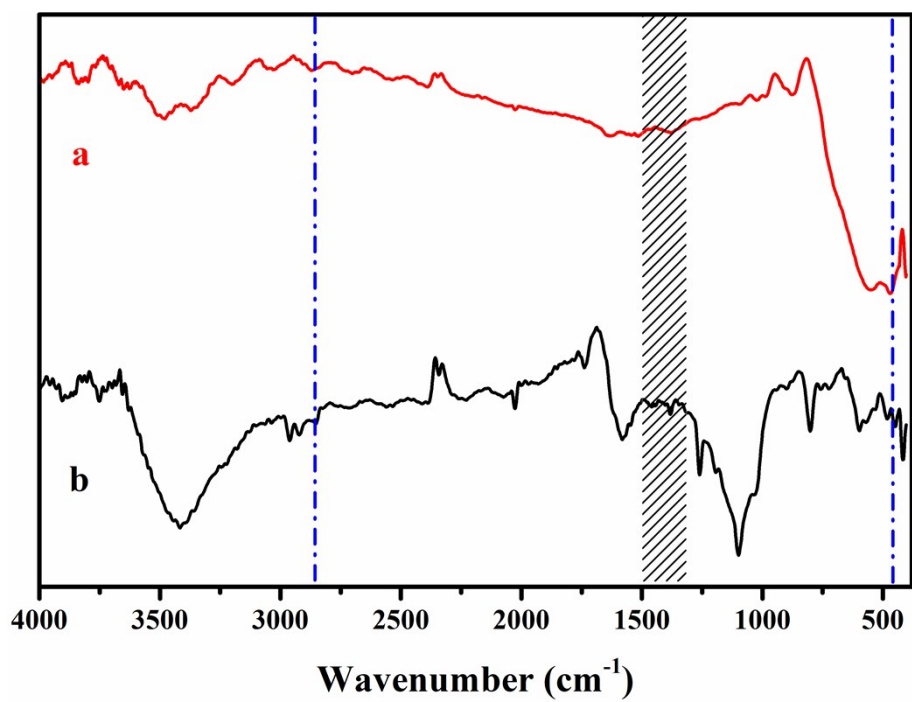

**Figure S11** FTIR spectra of (a) ZnO and (b) ZnO/C-Pre(9.1wt%).



**Table S1.** XPS elemental data (at%) of carbon materials.

| Sample            | C     | O     | N    | Zn   | Cl   |
|-------------------|-------|-------|------|------|------|
| ZnO/C-Pre(9.1wt%) | 78.87 | 11.51 | 6.86 | 2.36 | -    |
| C-Pre(9.1wt%)     | 97.22 | ND    | 2.14 | 0.35 | 0.29 |

**Table S2.** ICP-AES data (wt%) of carbon materials.

| Sample            | Zn   |
|-------------------|------|
| ZnO/C-Pre(9.1wt%) | 2.42 |
| C-Pre(16.7wt%)    | 0.05 |
| C-Pre(9.1wt%)     | 0.12 |
| C-Pre(6.2wt%)     | 0.14 |

## 7. CO<sub>2</sub> cycloaddition reaction

**Table S3.** Catalytic cycloaddition of CO<sub>2</sub> with epichlorohydrin to form cyclic carbonates<sup>a</sup>.

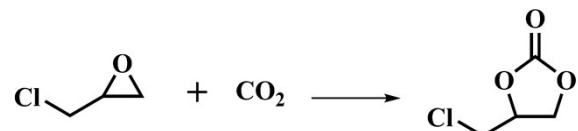

| Entry | Catalyst              | Time (h) | Yield <sup>b</sup> (%) |
|-------|-----------------------|----------|------------------------|
| 1     | ZnO/C-Pre(9.1wt%)     | 12       | 57                     |
| 2     | ZnO/C-Pre(9.1wt%)     | 24       | 75                     |
| 3     | ZnO/C-Pre(9.1wt%)     | 36       | 87                     |
| 4     | ZnO/C-Pre(9.1wt%)     | 48       | 91                     |
| 5     | ZnO/C-Pre(9.1wt%)     | 60       | 92                     |
| 6     | C-Pre(16.7wt%)        | 48       | 61                     |
| 7     | C-Pre(9.1wt%)         | 48       | 45                     |
| 8     | C-Pre(6.2wt%)         | 48       | 60                     |
| 9     | MOP-8C                | 48       | 69                     |
| 10    | ZnO/C-Pre(9.1wt%)/PBM | 48       | 54                     |

<sup>a</sup> Reaction conditions: 10 mmol epoxide, 10 mg catalyst, 1 mmol TBAB, CO<sub>2</sub> (0.1 MPa), 25 °C. <sup>b</sup>

Products were characterized by <sup>1</sup>H NMR and the yields refer to isolated products.

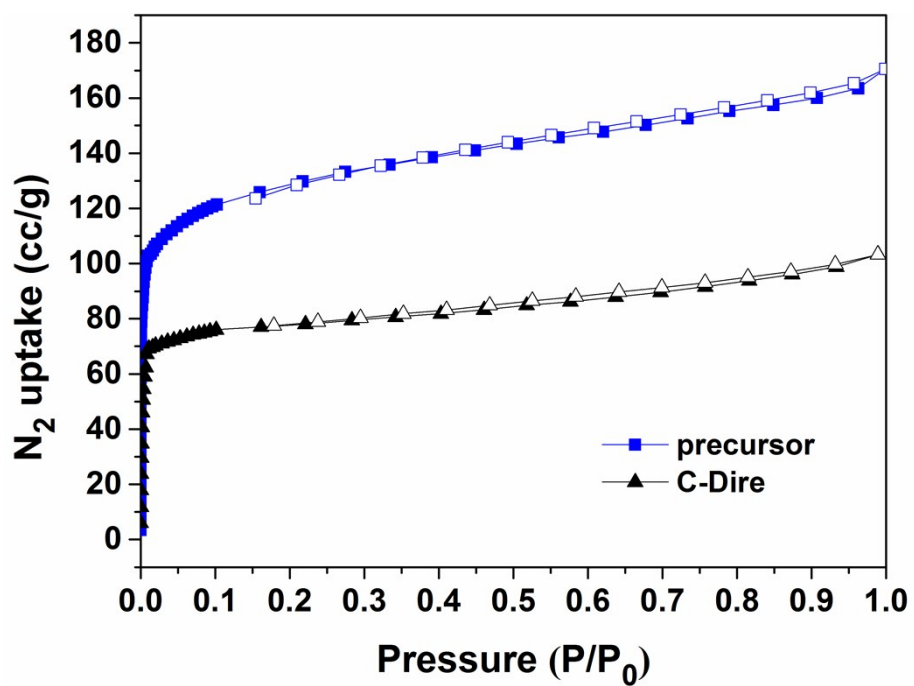

**Figure S12.** N<sub>2</sub> adsorption (solid symbols)/desorption (open symbols) isotherms of the precursor and the C-Dire (the carbon material pyrolysed without ZnCl<sub>2</sub> molten salt) at 77K.

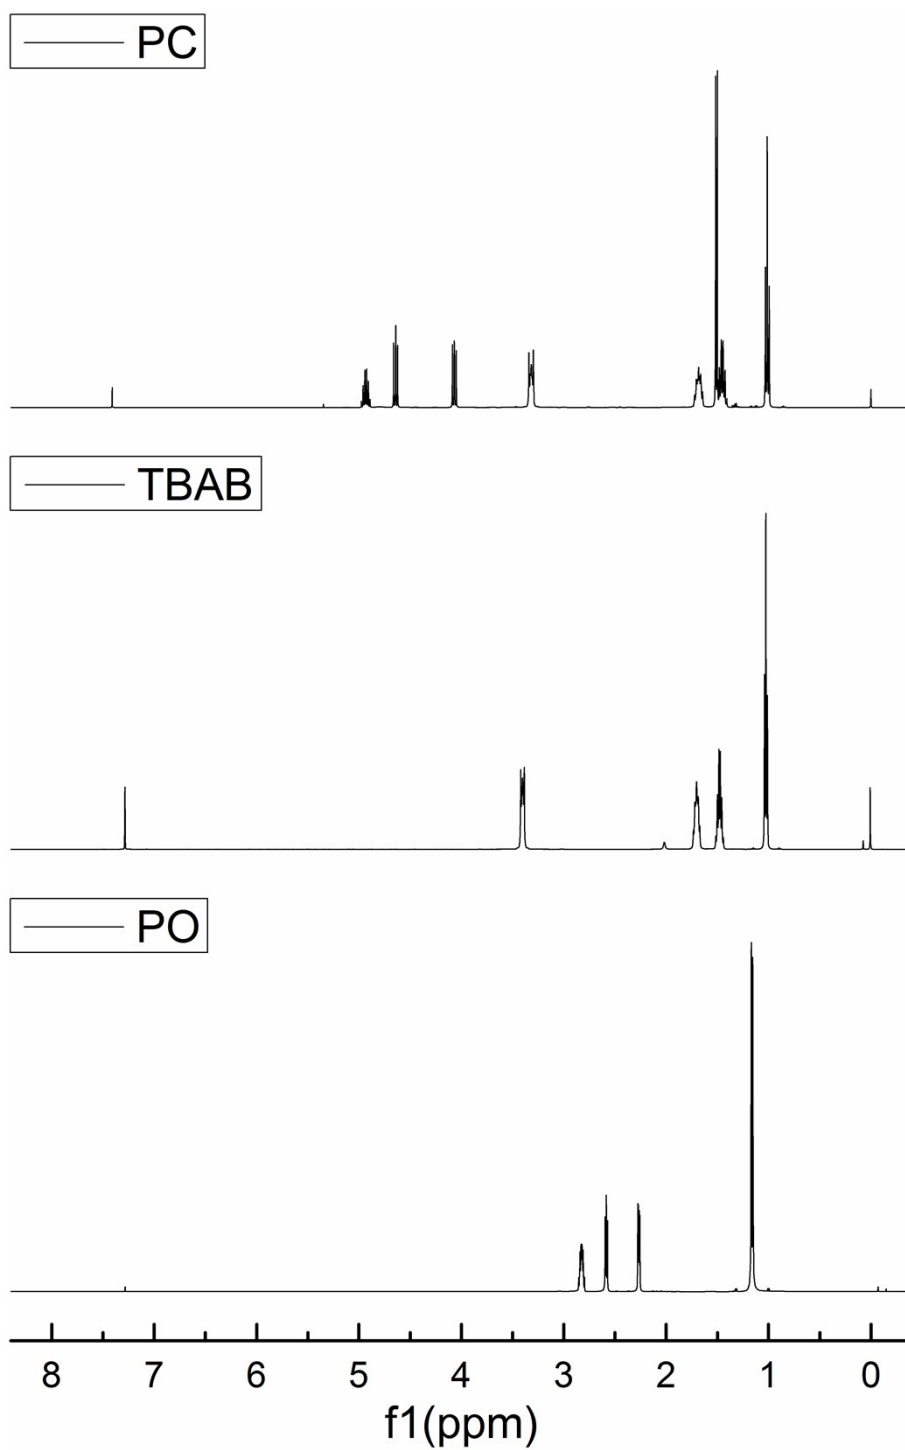

**Figure S13.**  $^1\text{H}$  NMR (400 MHz,  $\text{CDCl}_3$ , 298 K) spectra of ( $\pm$ )-propylene oxide and its corresponding cyclic carbonate ( $^1\text{H}$  NMR spectrum was obtained from the crude sample).

## Possible catalytic pathway

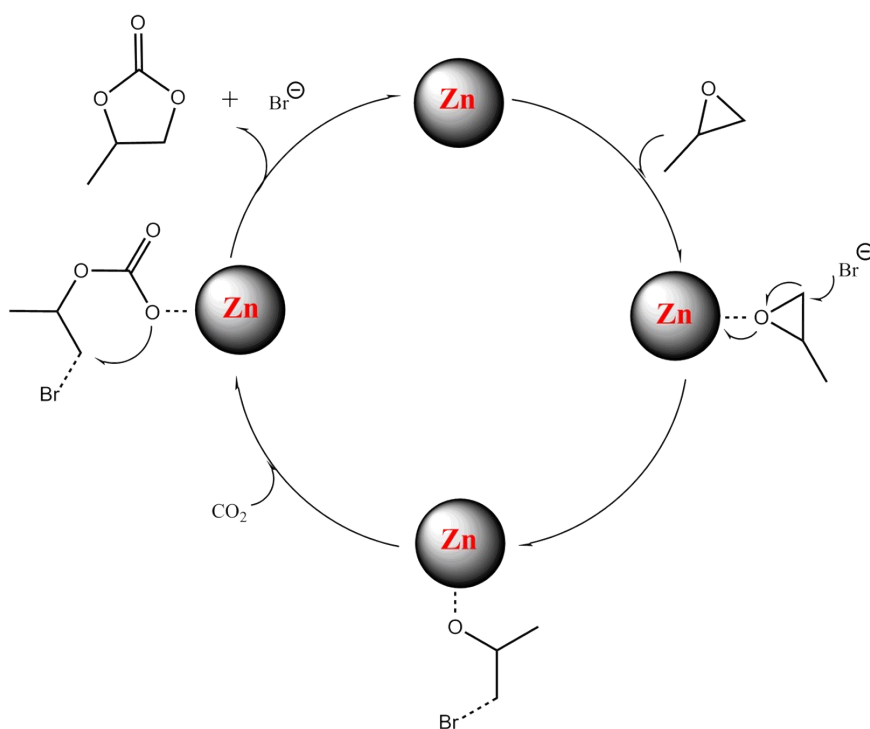

**Figure S14.** Scheme of possible catalytic mechanism for the reaction of epoxide and  $\text{CO}_2$  into cyclic carbonate catalyzed by  $\text{ZnO/C-Pre}(9.1\text{wt}\%)$ .

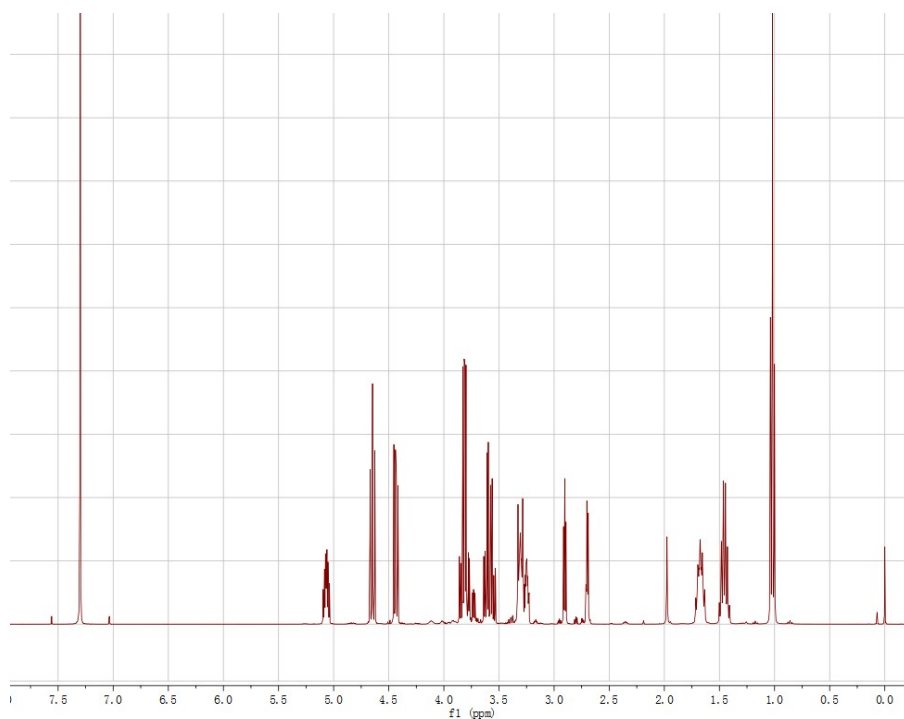

**Figure S15.**  $^1\text{H}$  NMR (400 MHz,  $\text{CDCl}_3$ , 298 K) spectra of epichlorohydrin and its corresponding cyclic carbonate at 12 h ( $^1\text{H}$  NMR spectrum was obtained from the crude sample).

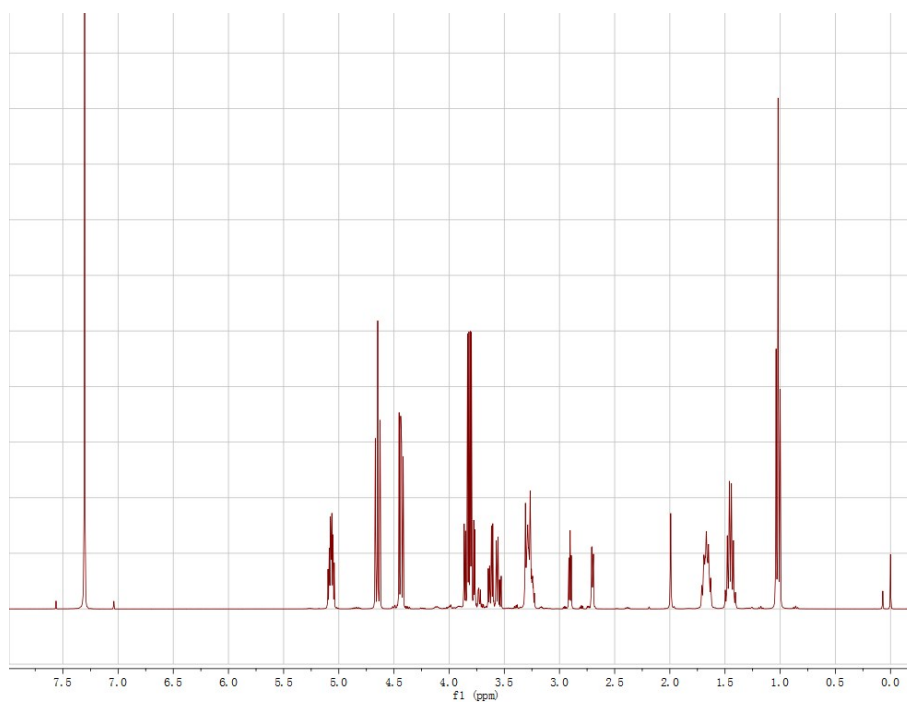

**Figure S16.** <sup>1</sup>H NMR (400 MHz, CDCl<sub>3</sub>, 298 K) spectra of epichlorohydrin and its corresponding cyclic carbonate at 24 h (<sup>1</sup>H NMR spectrum was obtained from the crude sample).

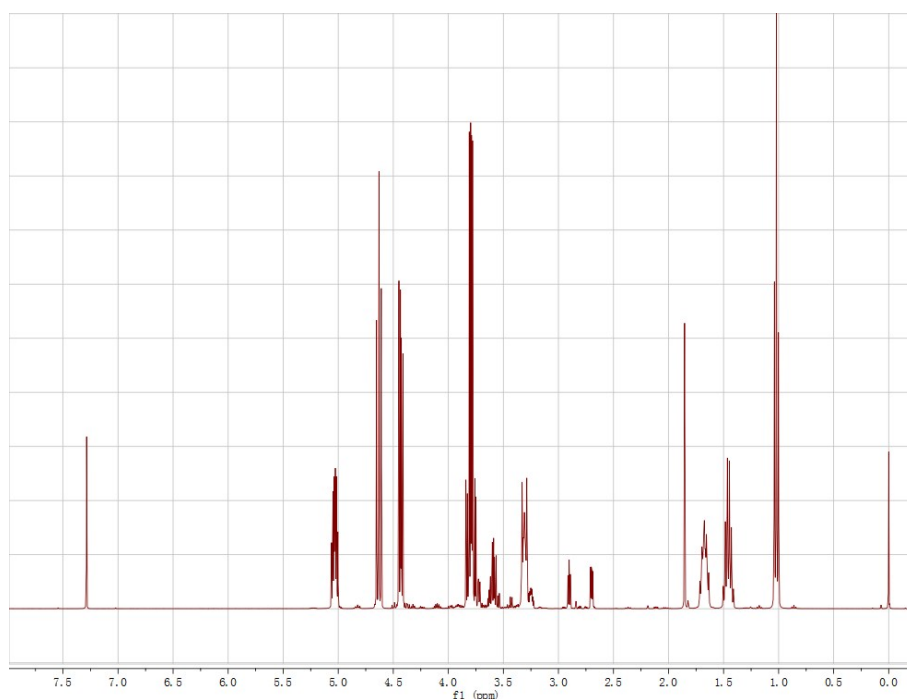

**Figure S17.** <sup>1</sup>H NMR (400 MHz, CDCl<sub>3</sub>, 298 K) spectra of epichlorohydrin and its corresponding cyclic carbonate at 36 h (<sup>1</sup>H NMR spectrum was obtained from the crude sample).

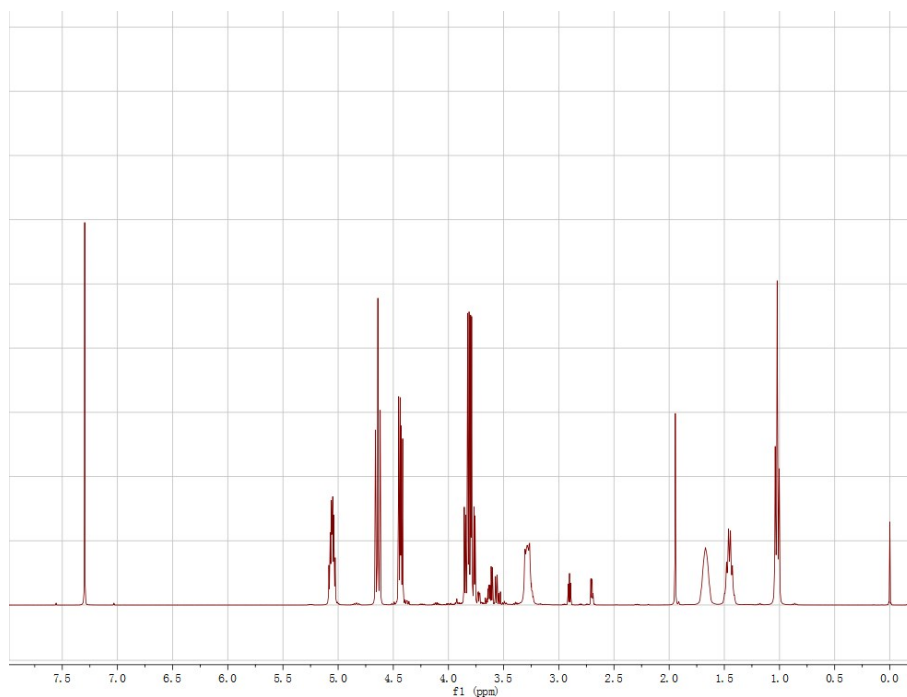

**Figure S18.** <sup>1</sup>H NMR (400 MHz, CDCl<sub>3</sub>, 298 K) spectra of epichlorohydrin and its corresponding cyclic carbonate at 48 h (<sup>1</sup>H NMR spectrum was obtained from the crude sample).

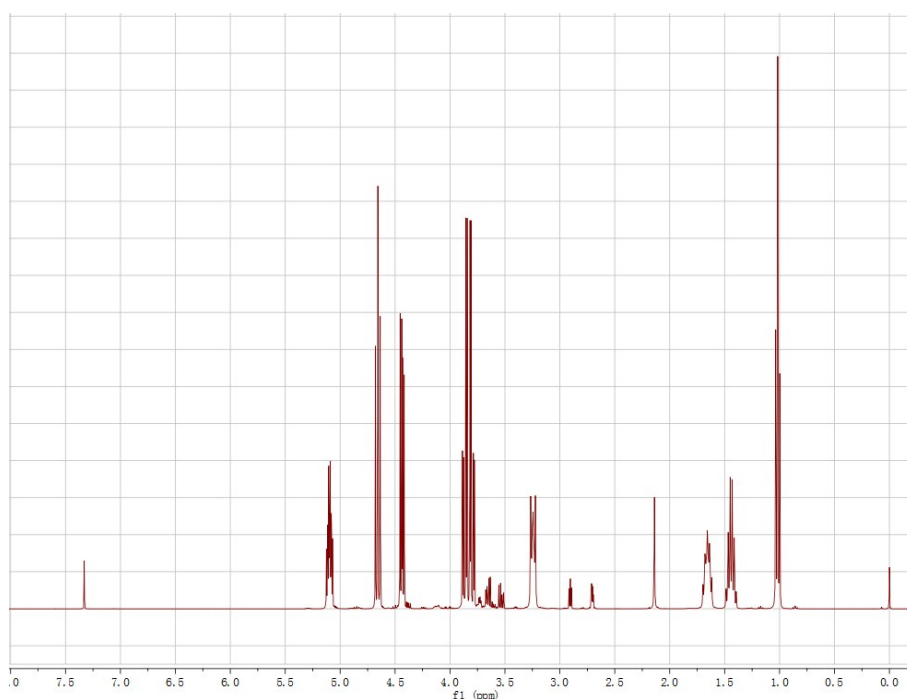

**Figure S19.** <sup>1</sup>H NMR (400 MHz, CDCl<sub>3</sub>, 298 K) spectra of epichlorohydrin and its corresponding cyclic carbonate at 60 h (<sup>1</sup>H NMR spectrum was obtained from the crude sample).

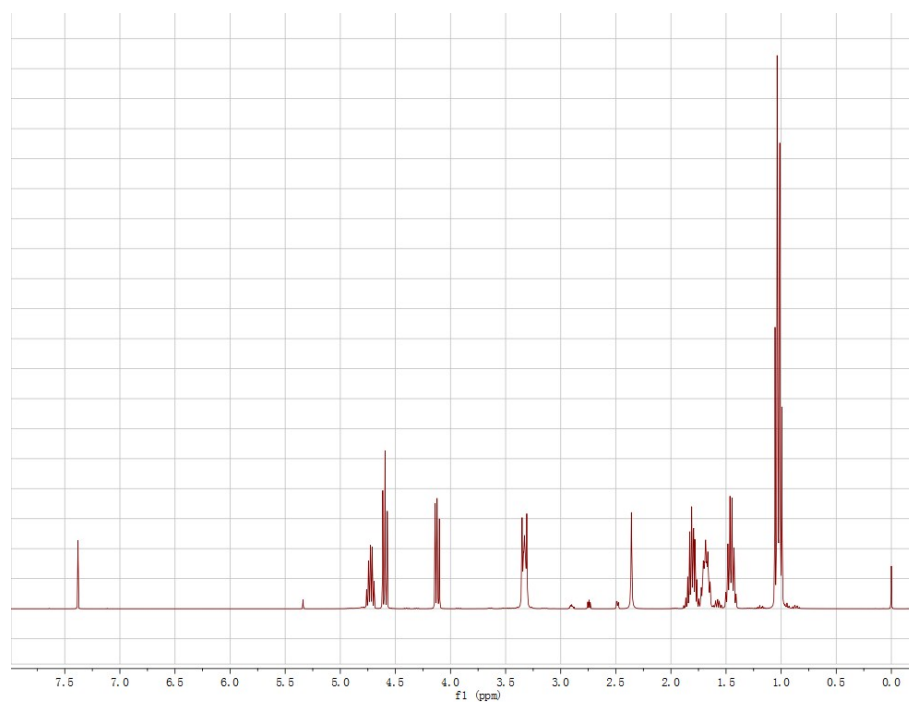

**Figure S20.** <sup>1</sup>H NMR (400 MHz, CDCl<sub>3</sub>, 298 K) spectra of 1,2-epoxybutane and its corresponding cyclic carbonate (<sup>1</sup>H NMR spectrum was obtained from the crude sample).

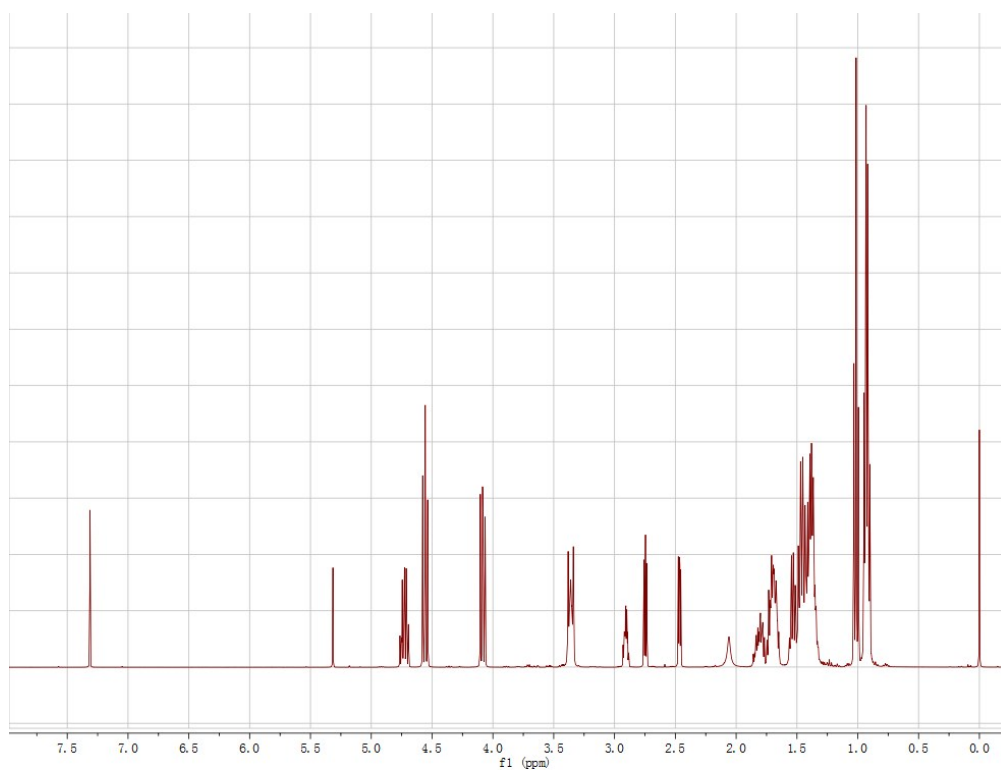

**Figure S21.** <sup>1</sup>H NMR (400 MHz, CDCl<sub>3</sub>, 298 K) spectra of cyclohexane oxide and its corresponding cyclic carbonate (<sup>1</sup>H NMR spectrum was obtained from the crude sample).



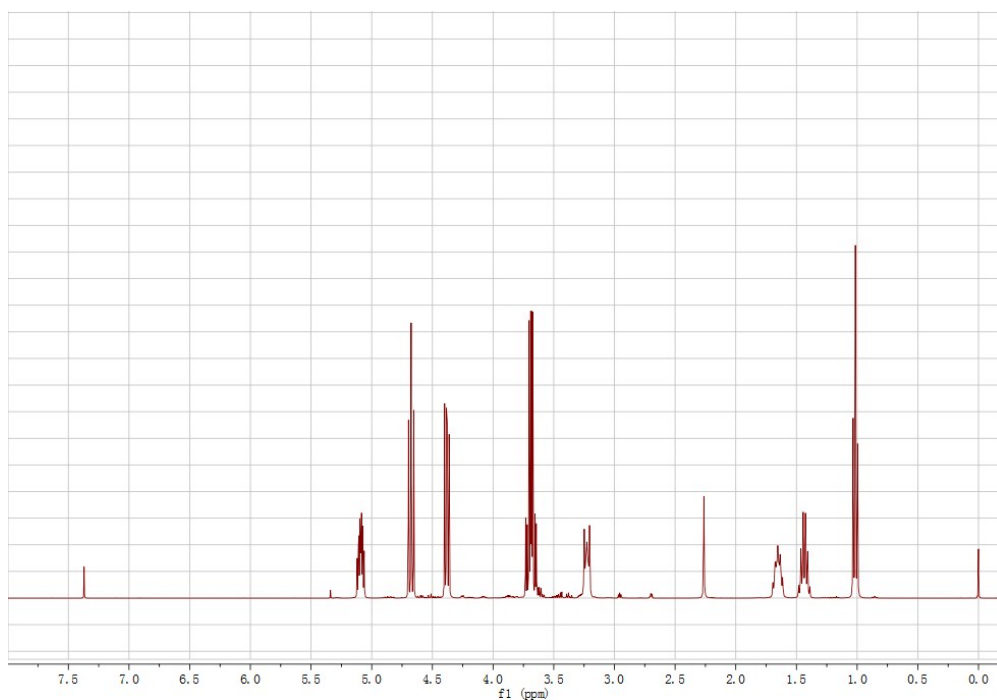

**Figure S22.**  $^1\text{H}$  NMR (400 MHz,  $\text{CDCl}_3$ , 298 K) spectra of epibromohydrin and its corresponding cyclic carbonate ( $^1\text{H}$  NMR spectrum was obtained from the crude sample).

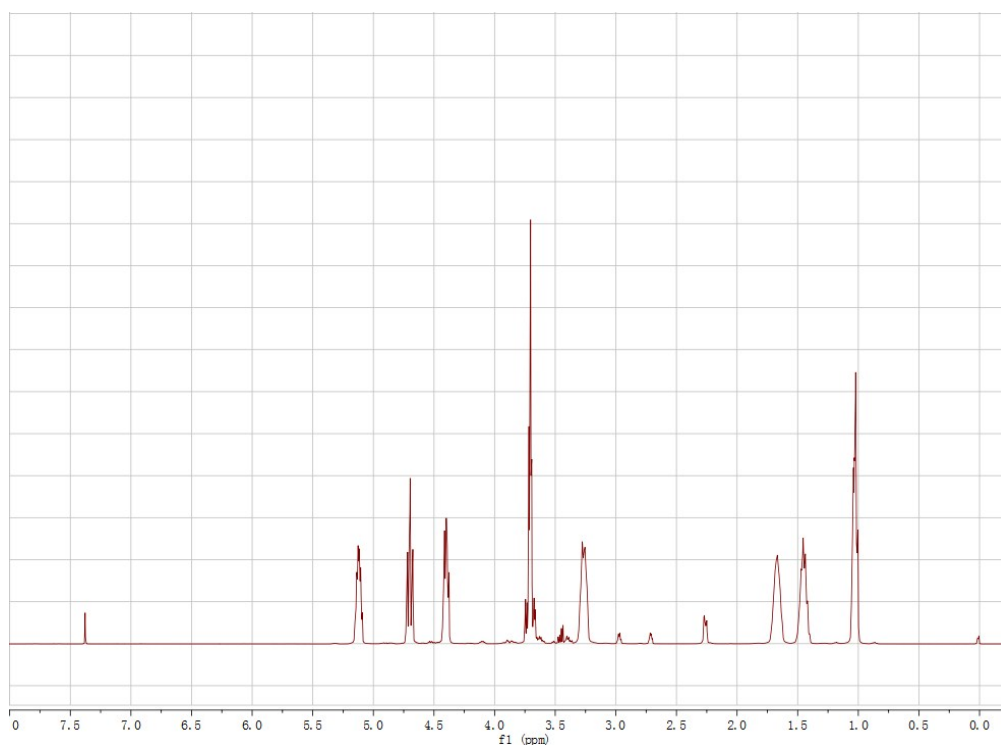

**Figure S23.**  $^1\text{H}$  NMR spectra (in  $\text{CDCl}_3$ ) of the reaction mixture (epibromohydrin) using  $\text{ZnO/C-Pre}(9.1\text{wt}\%)$  as a catalyst in the 2<sup>nd</sup> cycle of recyclability test.

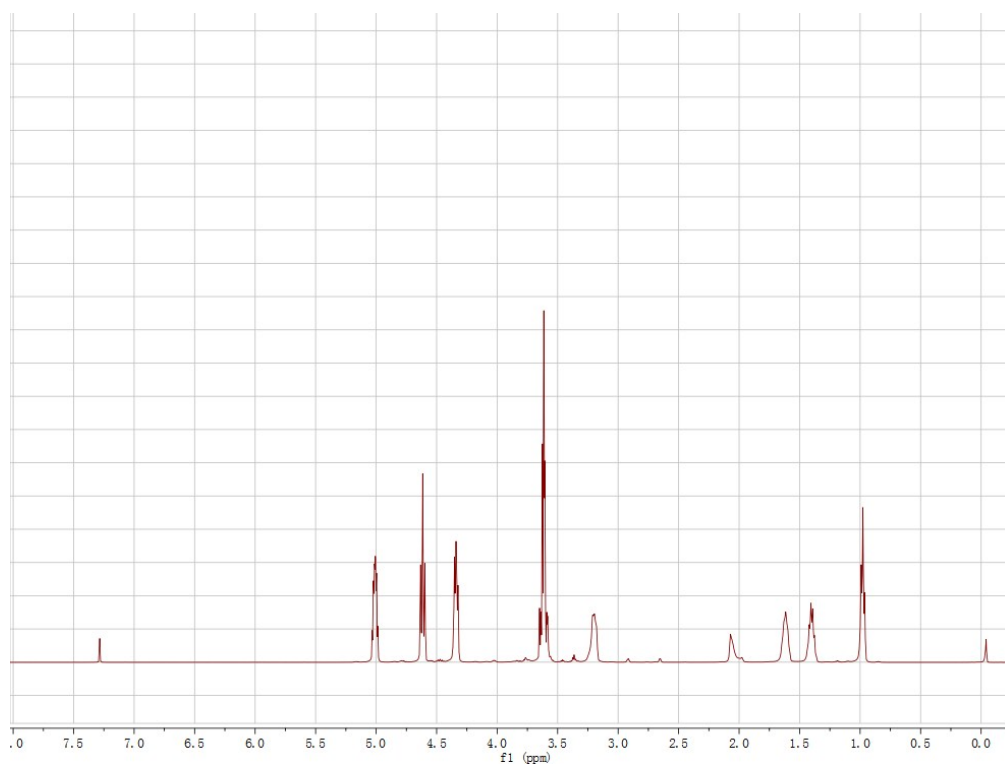

**Figure S24.** <sup>1</sup>H NMR spectra (in CDCl<sub>3</sub>) of the reaction mixture (epibromohydrin) using ZnO/C-Pre(9.1wt%) as a catalyst in the 3<sup>rd</sup> cycle of recyclability test.

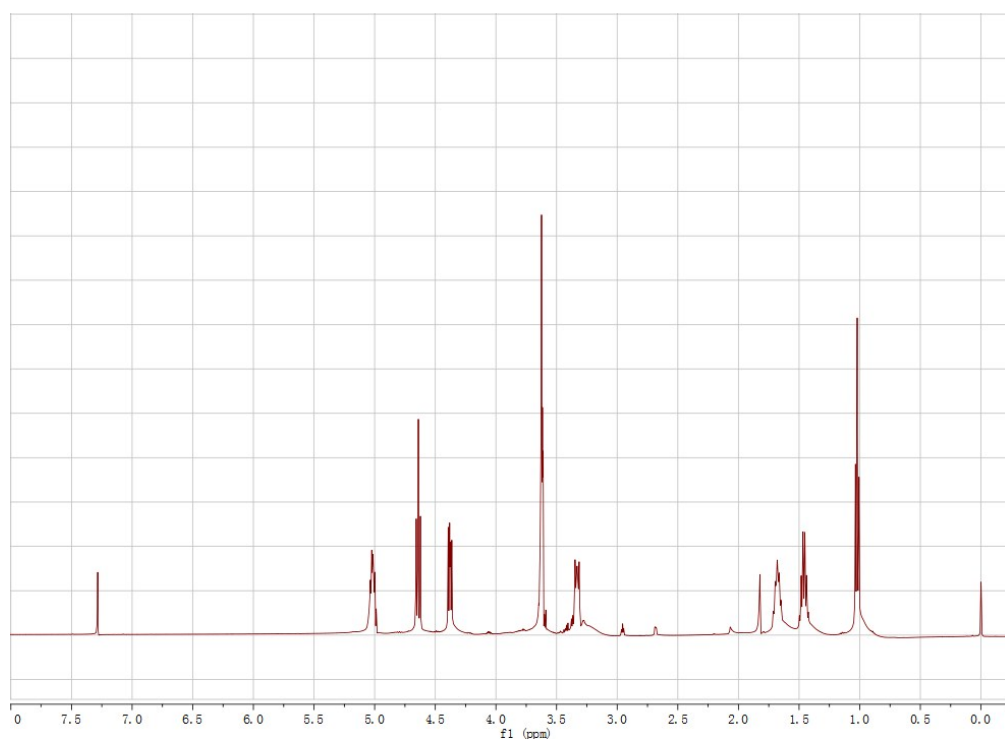

**Figure S25.** <sup>1</sup>H NMR spectra (in CDCl<sub>3</sub>) of the reaction mixture (epibromohydrin) using ZnO/C-Pre(9.1wt%) as a catalyst in the 4<sup>th</sup> cycle of recyclability test.

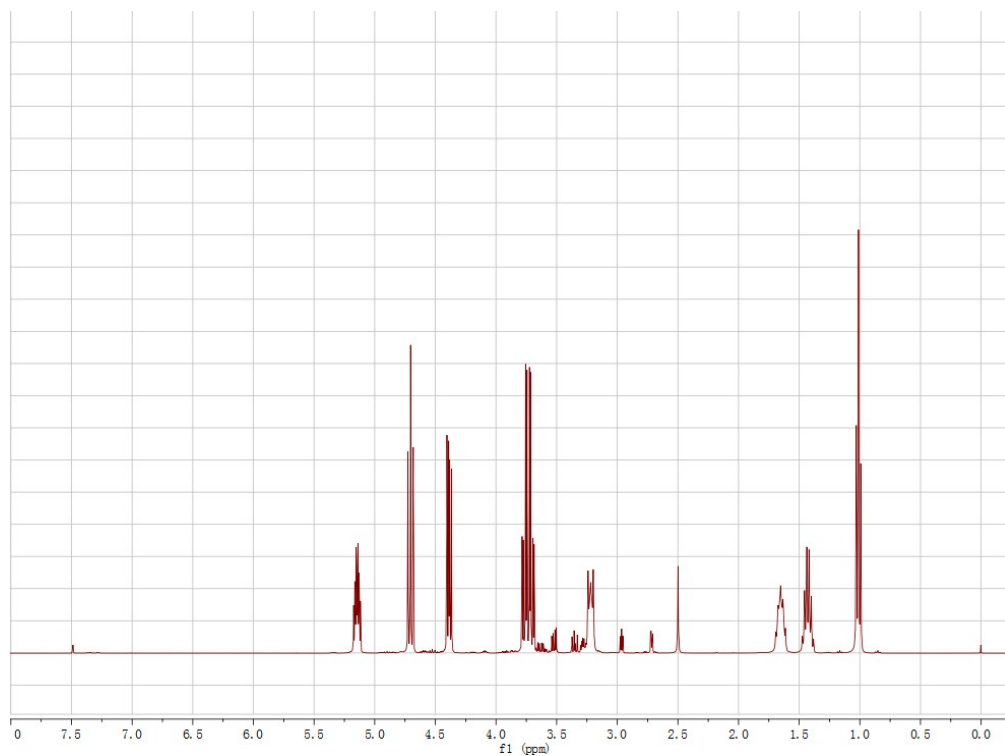

**Figure S26.** <sup>1</sup>H NMR spectra (in CDCl<sub>3</sub>) of the reaction mixture (epibromohydrin) using ZnO/C-Pre(9.1wt%) as a catalyst in the 5<sup>th</sup> cycle of recyclability test.
